# Supplementary material
Source: publisher figshare collection journal article supplement (https://acs.figshare.com/ndownloader/files/8917840)
Supplement: Supplementary file 1 [file 8917840]

## Supporting Information

### **Multi-Ligand Metal–Phenolic Assembly from Green Tea Infusions**

Md. Arifur Rahim,<sup>1</sup> Mattias Björnmalm,<sup>1</sup> Nadja Bertleff-Zieschang,<sup>1</sup> Yi Ju,<sup>1</sup> Srinivas Mettu,<sup>2</sup>  
Michael G. Leeming,<sup>3,4</sup> and Frank Caruso<sup>1,\*</sup>

#### **Affiliations**

<sup>1</sup>ARC Centre of Excellence in Convergent Bio-Nano Science and Technology, and the Department of Chemical and Biomolecular Engineering, The University of Melbourne, Parkville, Victoria 3010, Australia

<sup>2</sup>Department of Chemical and Biomolecular Engineering, The University of Melbourne, Parkville, Victoria 3010, Australia

<sup>3</sup>School of Chemistry, The University of Melbourne, Parkville, Victoria 3010, Australia

<sup>4</sup>Bio21 Institute of Molecular Science and Biotechnology, The University of Melbourne, Parkville, Victoria 3010, Australia

\*Correspondence to: [fcaruso@unimelb.edu.au](mailto:fcaruso@unimelb.edu.au)

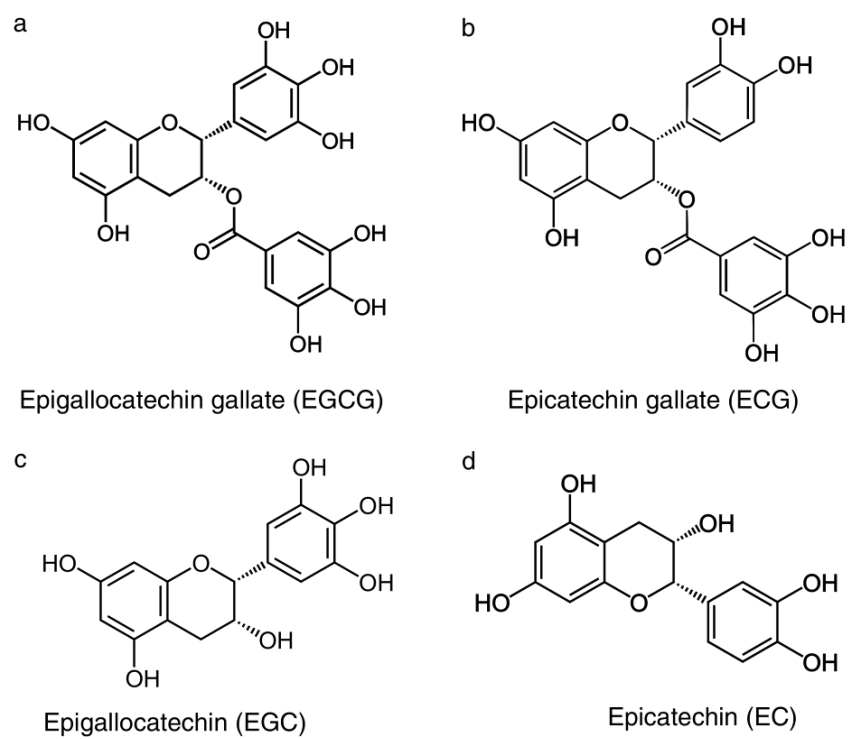

**Figure S1.** Chemical structures of the major GTCs present in GT: a) EGCG, b) ECG, c) EGC, and d) EC.

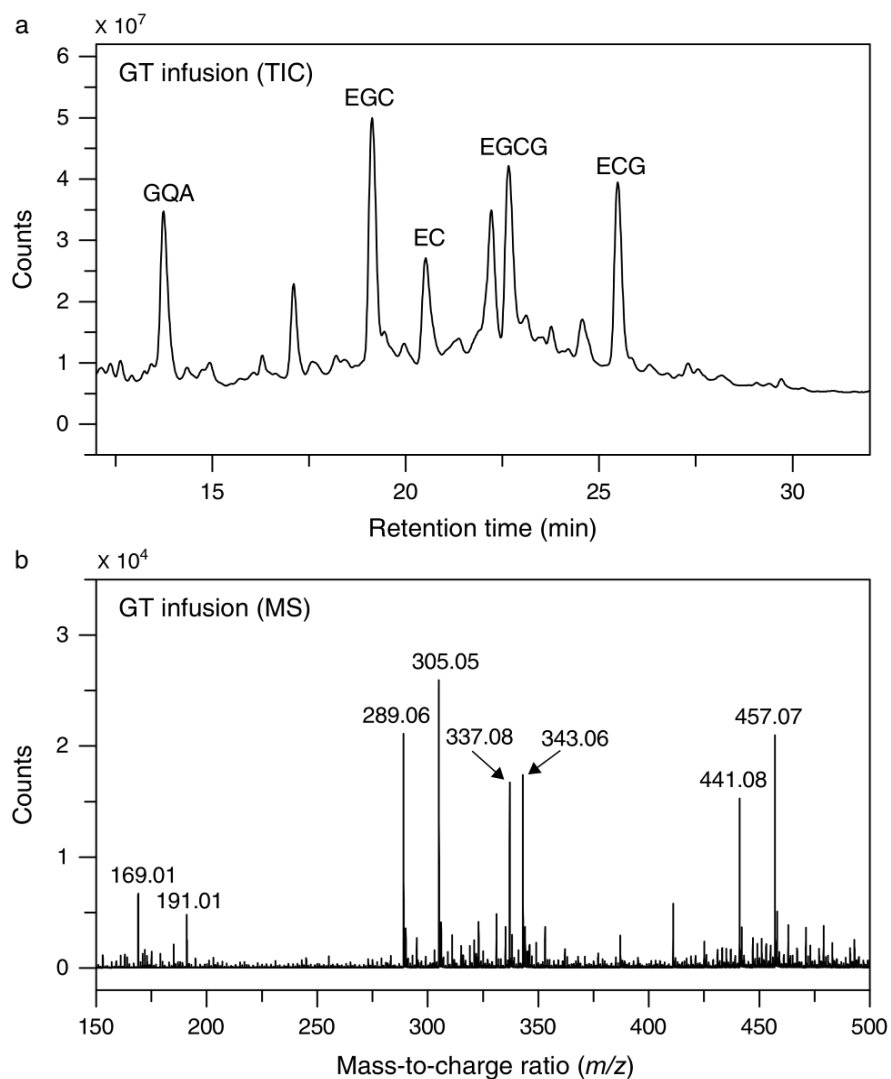

**Figure S2.** Liquid chromatography-mass spectrometry (LC-MS) analysis of a GT infusion. Total ion chromatogram (TIC) showing retention times (a) of the major compounds in GT infusion including galloquinic acid (GQA), EGC, EC, EGCG, and ECG. Retention times were found to be 13.7 (GQA), 19.1 (EGC), 20.5 (EC), 22.7 (EGCG), and 25.6 (ECG) min. The corresponding mass analyses (b) are summarized in Table S1.

**Table S1.** Summary of mass analyses of a GT infusion (from LC-MS analysis in Figure S2).

| Compound                 | Abbreviation | Formula              | Detected $m/z$ | Theoretical $m/z$ |
|--------------------------|--------------|----------------------|----------------|-------------------|
| Gallic acid              | GA           | $C_7H_6O_5$          | 169.01         | 169.01            |
| Quinic acid              | QA           | $C_7H_{12}O_6$       | 191.01         | 191.05            |
| Epicatechin              | EC           | $C_{15}H_{14}O_6$    | 289.06         | 289.07            |
| Epigallocatechin         | EGC          | $C_{15}H_{14}O_7$    | 305.05         | 305.06            |
| Coumaroylquinic acid     | CQA          | $C_{16}H_{18}O_8$    | 337.08         | 337.09            |
| Galloylquinic acid       | GQA          | $C_{14}H_{16}O_{10}$ | 343.06         | 343.06            |
| Epicatechin gallate      | ECG          | $C_{22}H_{18}O_{10}$ | 441.08         | 441.08            |
| Epigallocatechin gallate | EGCG         | $C_{22}H_{18}O_{11}$ | 457.07         | 457.07            |

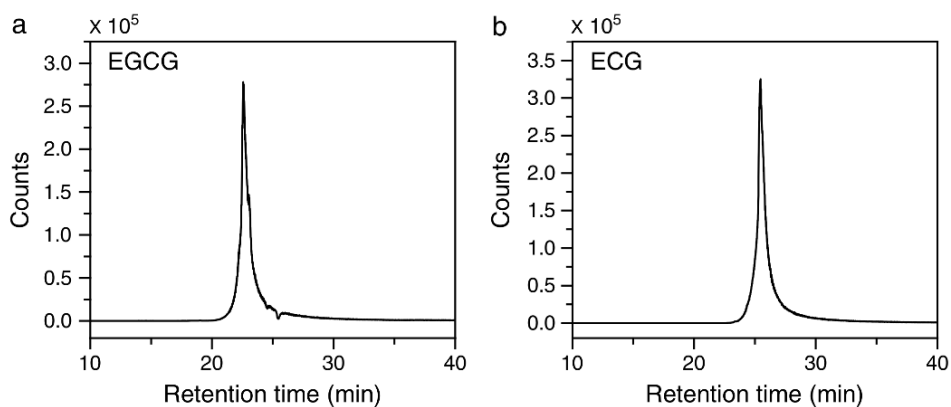

**Figure S3.** Extracted ion chromatograms showing the retention times of (a) pure EGCG ( $m/z$  457.07) and (b) ECG ( $m/z$  441.08). Retention times were found to be  $\sim 22.7$  and  $\sim 25.6$  min for pure EGCG and ECG, respectively.

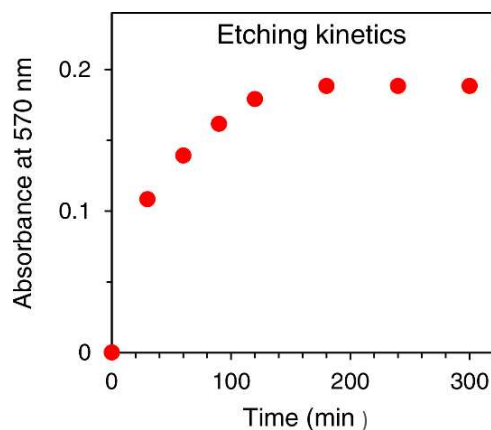

**Figure S4.** Etching kinetics of a rusted nail in a GT infusion. LMCT band appeared at 570 nm due to the formation of GTC/Fe<sup>III</sup> complexes via etching. The intensity of this band was observed to saturate after around 3 h.

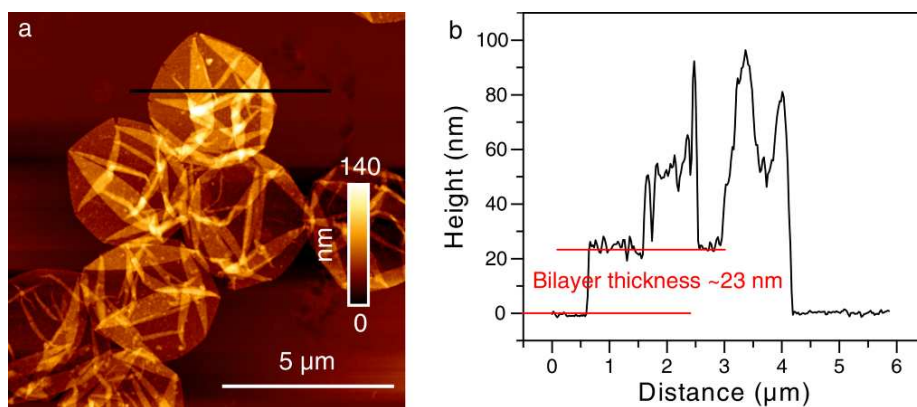

**Figure S5.** AFM micrograph (a) of GT/R-Fe<sup>III</sup> capsules obtained after 40 min of reaction time (from the immersion of the rusted iron nail into the GT/template dispersion until sampling), and the corresponding height profile (b) showing the collapsed bilayer thickness of the films (capsule shell thickness can be calculated as half of the bilayer thickness).

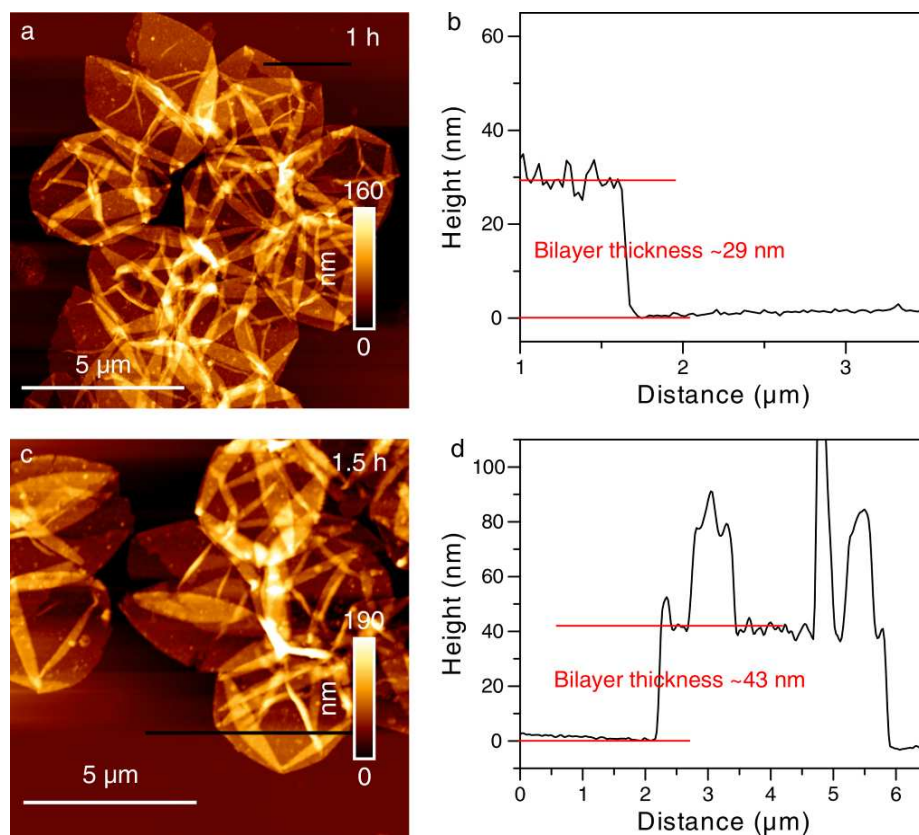

**Figure S6.** AFM topographies and corresponding height profiles of GT/R-Fe<sup>III</sup> capsules with increasing thickness over time: after 1 h (a,b) and 1.5 h (c,d) reaction time.

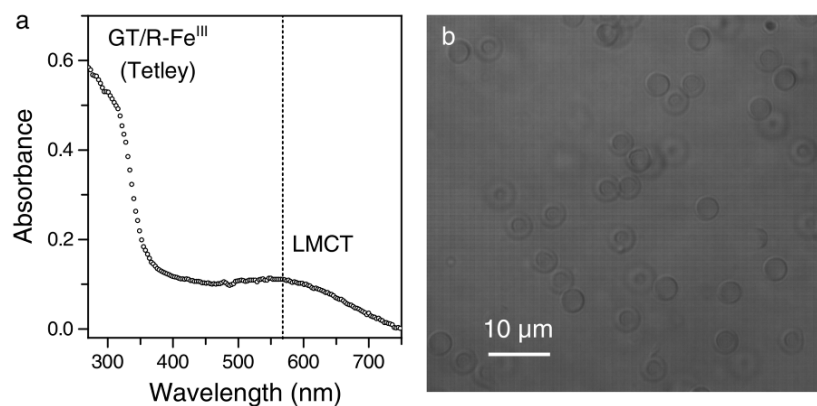

**Figure S7.** UV-vis absorption spectrum (a) and DIC image (b) of GT/R-Fe<sup>III</sup> capsules prepared by another commercial brand (Tetley) of green tea.

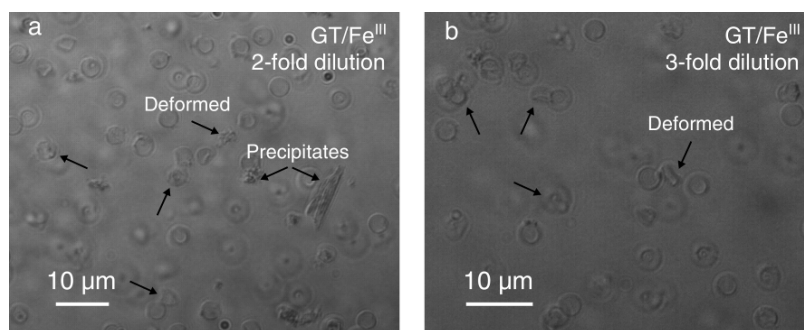

**Figure S8.** DIC images of GT/Fe<sup>III</sup> capsules (i.e., prepared using the conventional, iron salt solution-based method) prepared at 2-fold (a) and 3-fold (b) dilutions of the starting components.
